# Supplementary material for: New Genetic and Linguistic Analyses Show Ancient Human Influence on Baobab Evolution and Distribution in Australia
Source: PLoS One. 2015 Apr 1;10(4):e0119758. doi: 10.1371/journal.pone.0119758 (PMC4382155; doi:10.1371/journal.pone.0119758)
Supplement: S1 Dataset — (XLS) [file pone.0119758.s001.xls]

## Sheet: Sheet1
	AD06	AD08	AD13	AD14	AD15	AD18
JP100	145	279	354	203	144	276
JP100	150	285	357	203	147	286
JP101	145	279	348	203	144	274
JP101	145	285	361	209	147	276
JP102	145	279	340	205	144	274
JP102	147	285	344	205	147	276
JP104	145	285	346	203	147	274
JP104	145	285	348	205	147	276
JP105	147	279	350	203	144	274
JP105	147	285	352	205	147	276
JP107	145	285	352	205	147	272
JP107	162	285	352	211	147	278
JP108	147	279	350	205	144	276
JP108	162	279	354	227	144	276
JP109	147	279	348	203	144	272
JP109	162	279	350	205	144	272
JP110	145	285	331	203	147	274
JP110	145	285	352	203	147	276
JP111	145	285	339	205	147	272
JP111	147	285	355	205	147	278
JP112	147	279	337	205	144	274
JP112	147	285	343	229	147	276
JP113	145	279	337	203	144	278
JP113	160	279	337	203	144	280
JP114	145	279	334	203	144	274
JP114	156	285	354	205	147	274
JP115	145	279	337	203	144	276
JP115	150	279	337	205	144	276
JP116	145	279	337	203	144	274
JP116	145	279	356	205	144	276
JP117	145	285	337	205	147	272
JP117	152	285	350	225	147	272
JP118	147	285	341	203	147	274
JP118	164	285	343	205	147	278
JP120	145	279	337	195	144	274
JP120	145	279	339	203	144	276
JP121	145	279	334	205	144	274
JP121	145	285	339	205	147	280
JP122	145	279	337	205	144	274
JP122	145	285	339	205	147	276
JP123	145	285	337	203	147	274
JP123	145	285	363	225	147	276
JP124	145	279	341	203	144	274
JP124	158	279	361	231	144	274
JP125	145	279	342	203	144	274
JP125	145	285	345	203	147	274
JP126	154	285	338	203	147	276
JP126	164	285	352	203	147	280
JP127	145	279	352	203	144	274
JP127	164	285	359	205	147	276
JP128	145	285	338	205	147	278
JP128	154	293	343	209	156	278
JP129	145	279	337	203	144	274
JP129	145	279	339	205	144	280
JP130	145	279	344	203	144	276
JP130	152	285	354	203	147	278
JP131	145	282	342	203	144	274
JP131	145	285	342	205	147	280
JP132	160	285	355	205	147	274
JP132	160	285	363	205	147	276
JP133	160	285	339	205	147	276
JP133	160	285	352	205	147	280
JP134	145	285	352	203	147	276
JP134	160	285	354	205	150	278
JP135	145	285	337	203	147	274
JP135	158	285	347	203	147	282
JP136	152	285	354	203	147	276
JP136	166	285	354	205	147	280
JP137	145	285	333	203	147	276
JP137	162	285	346	205	147	280
JP138	145	285	352	203	147	274
JP138	152	293	352	203	156	278
JP139	145	285	337	203	144	272
JP139	154	285	340	219	147	282
JP140	145	279	339	205	144	276
JP140	152	285	359	205	147	286
JP141	166	279	339	203	144	276
JP141	166	285	363	203	147	278
JP142	145	279	342	205	144	278
JP142	152	285	357	205	147	280
JP143	143	285	337	203	147	274
JP143	162	285	361	211	147	274
JP144	145	279	339	203	144	274
JP144	168	285	357	205	147	286
JP145	164	279	341	203	144	276
JP145	170	285	354	203	147	278
JP146	145	285	337	203	147	278
JP146	152	285	354	205	156	282
JP147	143	282	337	203	144	274
JP147	164	285	354	205	147	274
JP148	164	279	337	219	144	278
JP148	168	285	355	219	147	280
JP149	143	285	348	193	147	274
JP149	145	285	359	203	147	276
JP150	170	285	339	203	147	278
JP150	170	285	347	205	147	278
JP151	147	285	337	203	147	272
JP151	147	293	339	205	156	276
JP152	145	279	359	203	144	276
JP152	170	285	365	217	147	278
JP153	145	279	355	203	144	276
JP153	147	285	355	205	147	282
JP154	160	285	363	199	147	276
JP154	168	285	365	205	147	280
JP155	145	285	341	205	147	274
JP155	172	285	354	215	147	276
JP156	152	279	339	203	144	276
JP156	172	285	340	203	147	278
JP157	152	285	344	205	147	274
JP157	152	285	348	205	147	278
JP158	143	279	359	205	144	278
JP158	168	285	365	237	147	280
JP159	145	279	341	203	144	276
JP159	162	285	352	203	147	278
JP160	145	279	341	203	144	278
JP160	170	285	347	205	147	278
JP163	143	279	339	215	144	276
JP163	172	285	344	217	147	276
JP164	158	285	0	0	147	0
JP164	158	285	0	0	147	0
JP165	145	279	344	205	144	276
JP165	154	285	349	237	147	276
JP166	143	279	339	205	144	278
JP166	154	285	349	217	147	280
JP167	0	282	0	0	147	0
JP167	0	285	0	0	147	0
JP168	150	279	337	203	147	278
JP168	162	285	352	203	150	280
JP169	145	279	348	205	147	276
JP169	145	285	355	223	150	278
JP170	143	285	339	203	147	274
JP170	154	285	349	239	147	274
JP171	160	285	341	203	147	272
JP171	168	285	344	205	147	278
JP172	152	285	345	217	147	274
JP172	170	285	361	219	147	282
JP173	145	279	347	203	144	276
JP173	145	285	355	203	147	276
JP174	145	285	339	203	147	278
JP174	156	285	357	229	147	280
JP175	145	285	345	203	147	276
JP175	162	285	349	203	147	276
JP176	145	285	335	205	147	276
JP176	170	285	347	205	147	280
JP177	147	279	337	203	144	278
JP177	152	285	337	205	147	282
JP178	145	293	339	205	156	274
JP178	160	293	339	239	156	276
JP179	147	279	337	203	144	274
JP179	162	285	337	205	147	274
JP180	145	285	337	203	147	274
JP180	164	293	354	203	156	278
JP182	145	279	341	203	144	274
JP182	147	293	354	229	156	278
JP184	145	279	337	205	144	276
JP184	145	285	341	205	147	278
JP185	145	279	339	203	144	272
JP185	145	293	339	205	156	274
JP186	145	285	337	229	144	276
JP186	147	285	347	231	147	280
JP188	145	279	337	203	144	276
JP188	145	285	337	203	147	276
JP190	145	279	339	203	144	274
JP190	147	285	356	203	147	280
JP192	145	285	337	203	147	274
JP192	147	293	343	205	156	278
JP194	145	285	350	203	144	276
JP194	158	285	341	205	147	280
JP196	145	279	345	203	144	280
JP196	158	285	347	203	147	280
JP198	145	279	337	225	144	278
JP198	145	279	339	229	147	280
JP200	145	279	337	205	144	276
JP200	145	285	339	221	147	280
JP214	145	279	337	203	144	274
JP214	145	285	347	225	147	280
JP216	150	279	341	205	144	276
JP216	162	285	342	205	147	278
JP217	147	279	350	205	144	276
JP217	164	282	354	205	147	276
JP218	145	279	355	205	144	274
JP218	145	282	361	209	147	276
JP219	164	285	357	203	147	274
JP219	164	285	357	205	147	286
JP220	164	279	341	203	144	276
JP220	170	279	363	203	144	282
JP221	145	279	334	203	144	272
JP221	154	279	361	203	144	282
JP222	143	279	341	205	144	274
JP222	145	285	357	205	147	276
JP223	152	279	338	203	144	274
JP223	156	279	354	205	144	278
JP224	145	285	339	203	147	274
JP224	164	285	346	203	147	280
JP225	145	285	339	203	147	272
JP225	145	285	339	205	147	278
JP226	145	279	348	205	144	276
JP226	147	279	357	205	144	280
JP227	145	279	339	201	144	276
JP227	145	285	355	205	147	276
JP228	145	285	339	203	147	274
JP228	145	285	357	203	147	276
JP229	145	285	352	203	147	276
JP229	160	285	354	203	147	278
JP230	145	285	352	205	147	272
JP230	168	293	359	205	156	280
JP231	164	279	339	203	144	276
JP231	164	285	342	221	147	276
JP232	145	279	339	203	144	276
JP232	147	285	354	205	147	276
JP233	145	279	339	205	144	276
JP233	147	285	354	205	147	276
JP234	145	279	355	203	144	276
JP234	145	285	363	203	147	284
JP235	145	285	343	203	147	272
JP235	156	285	355	205	147	276
JP236	145	285	342	205	147	276
JP236	145	285	352	221	147	278
JP237	145	279	334	205	144	274
JP237	145	285	339	205	147	280
JP238	145	279	339	203	144	272
JP238	150	279	355	203	144	278
JP239	154	285	341	203	147	274
JP239	156	285	361	205	147	282
JP240	150	285	335	203	147	274
JP240	156	285	337	205	147	278
JP241	166	285	333	203	147	272
JP241	166	285	359	205	147	280
JP242	145	279	341	203	144	276
JP242	168	285	352	225	147	278
JP243	145	279	361	203	144	274
JP243	147	285	361	205	147	276
JP244	145	285	346	205	147	272
JP244	145	285	354	221	147	274
JP245	143	279	334	205	144	274
JP245	145	285	339	221	147	278
JP246	145	285	344	203	147	278
JP246	145	285	355	205	147	278
JP248	145	285	339	203	147	274
JP248	152	285	343	205	147	278
JP249	145	285	337	203	147	278
JP249	147	285	345	203	147	278
JP250	145	285	338	203	147	278
JP250	158	285	345	205	147	278
JP251	147	285	345	203	147	272
JP251	168	285	350	205	147	274
JP252	145	285	337	203	147	274
JP252	145	285	339	205	147	280
JP253	145	279	339	225	144	276
JP253	145	285	339	225	147	278
JP254	145	279	339	203	144	276
JP254	145	285	339	203	147	276
JP29	145	279	337	203	144	272
JP29	145	285	339	203	147	280
JP30	145	279	343	205	144	276
JP30	145	285	343	221	147	276
JP31	145	279	336	203	144	276
JP31	145	285	343	205	147	278
JP32	145	279	341	203	144	272
JP32	145	285	361	203	147	274
JP34	145	285	334	203	147	276
JP34	158	285	350	205	147	280
JP35	145	279	337	203	144	276
JP35	170	285	339	233	147	276
JP37	147	285	339	203	147	276
JP37	158	285	347	203	147	276
JP38	147	285	337	205	147	276
JP38	147	285	337	225	147	280
JP39	145	285	341	205	147	272
JP39	145	285	355	205	147	280
JP40	145	279	337	203	144	282
JP40	145	285	343	225	147	282
JP41	145	279	339	203	144	274
JP41	145	279	343	231	144	276
JP42	145	279	339	203	144	280
JP42	170	285	342	203	147	280
JP43	145	285	336	205	147	276
JP43	166	285	337	205	147	278
JP44	145	279	343	203	144	272
JP44	158	285	355	203	147	278
JP45	158	279	334	203	144	276
JP45	158	279	355	231	144	280
JP46	145	279	337	203	144	276
JP46	147	285	343	205	147	276
JP48	145	285	339	203	147	276
JP48	145	285	341	219	147	276
JP49	145	279	341	205	147	272
JP49	164	285	343	205	150	278
JP49A	145	279	341	205	144	272
JP49A	164	285	343	205	147	278
JP50	166	279	341	203	144	274
JP50	170	279	343	205	144	276
JP51	145	279	339	205	144	274
JP51	166	285	339	219	147	276
JP52	147	279	337	203	144	276
JP52	168	285	343	205	147	276
JP53	145	279	335	203	144	276
JP53	168	285	337	203	147	276
JP54	147	279	337	203	144	274
JP54	147	285	337	205	147	278
JP55	145	279	341	225	144	276
JP55	164	285	341	231	147	278
JP56	145	285	337	203	147	274
JP56	166	285	341	225	147	276
JP57	158	285	337	203	147	274
JP57	158	285	337	225	147	276
JP58	145	279	337	203	144	276
JP58	145	285	343	203	147	278
JP59	145	285	336	203	147	274
JP59	147	285	343	205	147	280
JP60	138	285	335	205	147	276
JP60	138	285	348	225	147	278
JP62	145	279	343	203	144	274
JP62	160	285	354	205	147	274
JP63	145	279	341	203	144	274
JP63	145	279	343	203	144	274
JP64	145	279	337	205	144	274
JP64	145	279	337	227	144	278
JP66	145	279	335	203	144	272
JP66	145	285	337	205	147	276
JP67	145	279	339	205	144	274
JP67	145	279	339	219	144	274
JP69	145	285	337	203	147	274
JP69	147	285	341	219	147	278
JP70	138	279	335	203	144	276
JP70	145	285	348	205	147	278
JP71	145	279	335	205	144	276
JP71	145	285	352	205	147	276
JP72	138	279	348	205	144	274
JP72	145	285	355	205	147	276
JP73	145	279	348	203	144	272
JP73	166	285	352	205	147	280
JP75	145	285	339	205	147	278
JP75	164	285	348	205	147	284
JP76	145	285	341	203	147	276
JP76	145	285	352	205	147	276
JP77	145	279	331	205	144	274
JP77	145	285	348	205	147	276
JP78	145	279	343	205	144	274
JP78	166	285	348	217	147	274
JP79	145	279	343	203	144	276
JP79	164	285	343	219	147	278
JP80	138	279	331	205	144	276
JP80	164	285	348	211	147	284
JP81	145	285	343	205	147	274
JP81	164	285	343	219	147	276
JP82	138	279	337	203	144	274
JP82	145	285	341	205	147	278
JP84	145	279	348	203	144	274
JP84	178	285	355	205	147	278
JP85	168	279	341	203	144	276
JP85	178	285	355	203	147	278
JP90	147	279	337	205	144	276
JP90	164	279	341	205	144	278
JP91	145	279	331	203	144	276
JP91	164	285	339	203	147	276
JP92	145	279	342	205	144	274
JP92	145	279	357	205	144	278
JP93	138	285	342	205	147	274
JP93	138	285	350	205	147	278
JP94	138	285	331	205	147	274
JP94	145	285	357	211	147	274
JP95	145	279	331	205	144	274
JP95	145	285	348	211	147	276
JP96	145	285	340	203	147	272
JP96	145	285	357	209	147	278
JP97	145	285	337	205	147	276
JP97	166	285	348	205	147	284
JP98	145	279	331	203	144	274
JP98	145	279	348	205	144	278
JP99	154	279	0	203	144	278
JP99	170	285	0	205	147	280
KBL81	162	279	346	203	144	280
KBL81	168	285	352	203	147	282
KLB23	145	279	334	205	0	0
KLB23	164	285	361	225	0	0
KLB24	145	279	335	203	144	274
KLB24	164	285	361	203	147	278
KLB34	145	279	339	203	144	272
KLB34	145	285	341	225	147	276
KLB39	154	285	341	203	147	276
KLB39	170	285	343	205	147	280
KLB82	143	285	337	203	147	276
KLB82	145	285	355	203	147	278
KLB100	145	279	341	205	144	272
KLB100	145	279	355	205	144	278
KLB101	145	279	339	225	144	274
KLB101	156	285	357	231	147	278
KLB102	145	279	335	205	144	274
KLB102	145	285	341	225	147	282
KLB103	145	279	337	203	144	0
KLB103	145	279	337	203	144	0
KLB104	145	279	339	203	144	274
KLB104	145	285	341	203	147	282
KLB105	164	279	341	203	144	280
KLB105	168	285	343	205	147	280
KLB107	145	279	339	203	144	272
KLB107	145	285	350	225	147	272
KLB108	0	285	0	205	147	0
KLB108	0	285	0	211	147	0
KLB109	145	279	334	203	144	272
KLB109	168	285	339	203	147	276
KLB110	145	279	338	205	144	276
KLB110	145	285	338	205	147	278
KLB111	145	279	339	203	144	272
KLB111	147	285	343	225	147	276
KLB112	138	279	334	205	144	280
KLB112	147	279	337	225	144	280
KLB113	145	285	344	205	147	274
KLB113	147	285	357	225	147	274
KLB114	145	279	336	205	144	276
KLB114	147	285	341	221	147	278
KLB115	145	279	335	203	144	278
KLB115	147	279	345	203	144	278
KLB116	145	279	343	203	144	276
KLB116	164	285	345	203	147	284
KLB117	145	279	343	203	144	0
KLB117	145	285	343	203	147	0
KLB118	145	279	335	203	144	276
KLB118	145	279	339	211	144	276
KLB119	145	279	337	205	144	276
KLB119	145	285	344	211	147	276
KLB120	145	279	337	203	144	272
KLB120	145	285	341	205	147	278
KLB121	145	279	339	203	144	276
KLB121	145	279	343	205	144	278
KLB122	147	279	335	203	144	274
KLB122	147	285	354	205	147	274
KLB123	147	279	335	203	144	274
KLB123	147	285	343	203	147	276
KLB124	145	279	337	203	144	274
KLB124	150	285	339	211	147	278
KLB125	145	279	339	203	144	274
KLB125	145	285	343	203	147	278
KLB126	145	285	339	203	147	276
KLB126	150	285	355	203	147	276
KLB127	145	279	339	203	144	276
KLB127	147	285	339	203	147	276

## Sheet: Sheet2
sample id	Score AD06	Score AD08	Score AD13	Score AD14	Score AD15	Score AD18
29	145	279	337	203	144	272
29	145	285	339	203	147	280
30	145	279	343	205	144	276
30	145	285	343	221	147	276
31	145	279	336	203	144	276
31	145	285	343	205	147	278
32	145	279	341	203	144	272
32	145	285	361	203	147	274
34	145	285	334	203	147	276
34	158	285	350	205	147	280
35	145	279	337	203	144	276
35	170	285	339	233	147	276
37	147	285	339	203	147	276
37	158	285	347	203	147	276
38	147	285	337	205	147	276
38	147	285	337	225	147	280
39	145	285	341	205	147	272
39	145	285	355	205	147	280
40	145	279	337	203	144	282
40	145	285	343	225	147	282
41	145	279	339	203	144	274
41	145	279	343	231	144	276
42	145	279	339	203	144	280
42	170	285	342	203	147	280
43	145	285	336	205	147	276
43	166	285	337	205	147	278
44	145	279	343	203	144	272
44	158	285	355	203	147	278
45	158	279	334	203	144	276
45	158	279	355	231	144	280
46	145	279	337	203	144	276
46	147	285	343	205	147	276
48	145	285	339	203	147	276
48	145	285	341	219	147	276
49	145	279	341	205	147	272
49	164	285	343	205	150	278
50	166	279	341	203	144	274
50	170	279	343	205	144	276
51	145	279	339	205	144	274
51	166	285	339	219	147	276
52	147	279	337	203	144	276
52	168	285	343	205	147	276
53	145	279	335	203	144	276
53	168	285	337	203	147	276
54	147	279	337	203	144	274
54	147	285	337	205	147	278
55	145	279	341	225	144	276
55	164	285	341	231	147	278
56	145	285	337	203	147	274
56	166	285	341	225	147	276
57	158	285	337	203	147	274
57	158	285	337	225	147	276
58	145	279	337	203	144	276
58	145	285	343	203	147	278
59	145	285	336	203	147	274
59	147	285	343	205	147	280
60	138	285	335	205	147	276
60	138	285	348	225	147	278
62	145	279	343	203	144	274
62	160	285	354	205	147	274
63	145	279	341	203	144	274
63	145	279	343	203	144	274
64	145	279	337	205	144	274
64	145	279	337	227	144	278
66	145	279	335	203	144	272
66	145	285	337	205	147	276
67	145	279	339	205	144	274
67	145	279	339	219	144	274
69	145	285	337	203	147	274
69	147	285	341	219	147	278
70	138	279	335	203	144	276
70	145	285	348	205	147	278
71	145	279	335	205	144	276
71	145	285	352	205	147	276
72	138	279	348	205	144	274
72	145	285	355	205	147	276
73	145	279	348	203	144	272
73	166	285	352	205	147	280
75	145	285	339	205	147	278
75	164	285	348	205	147	284
76	145	285	341	203	147	276
76	145	285	352	205	147	276
77	145	279	331	205	144	274
77	145	285	348	205	147	276
78	145	279	343	205	144	274
78	166	285	348	217	147	274
79	145	279	343	203	144	276
79	164	285	343	219	147	278
80	138	279	331	205	144	276
80	164	285	348	211	147	284
81	145	285	343	205	147	274
81	164	285	343	219	147	276
82	138	279	337	203	144	274
82	145	285	341	205	147	278
84	145	279	348	203	144	274
84	178	285	355	205	147	278
85	168	279	341	203	144	276
85	178	285	355	203	147	278
90	147	279	337	205	144	276
90	164	279	341	205	144	278
91	145	279	331	203	144	276
91	164	285	339	203	147	276
92	145	279	342	205	144	274
92	145	279	357	205	144	278
93	138	285	342	205	147	274
93	138	285	350	205	147	278
94	138	285	331	205	147	274
94	145	285	357	211	147	274
95	145	279	331	205	144	274
95	145	285	348	211	147	276
96	145	285	340	203	147	272
96	145	285	357	209	147	278
97	145	285	337	205	147	276
97	166	285	348	205	147	284
98	145	279	331	203	144	274
98	145	279	348	205	144	278
99	154	279	0	203	144	278
99	170	285	0	205	147	280
100	145	279	354	203	144	276
100	150	285	357	203	147	286
101	145	279	348	203	144	274
101	145	285	361	209	147	276
102	145	279	340	205	144	274
102	147	285	344	205	147	276
104	145	285	346	203	147	274
104	145	285	348	205	147	276
105	147	279	350	203	144	274
105	147	285	352	205	147	276
107	145	285	352	205	147	272
107	162	285	352	211	147	278
108	147	279	350	205	144	276
108	162	279	354	227	144	276
109	147	279	348	203	144	272
109	162	279	350	205	144	272
110	145	285	331	203	147	274
110	145	285	352	203	147	276
111	145	285	339	205	147	272
111	147	285	355	205	147	278
112	147	279	337	205	144	274
112	147	285	343	229	147	276
113	145	279	337	203	144	278
113	160	279	337	203	144	280
114	145	279	334	203	144	274
114	156	285	354	205	147	274
115	145	279	337	203	144	276
115	150	279	337	205	144	276
116	145	279	337	203	144	274
116	145	279	356	205	144	276
117	145	285	337	205	147	272
117	152	285	350	225	147	272
118	147	285	341	203	147	274
118	164	285	343	205	147	278
120	145	279	337	195	144	274
120	145	279	339	203	144	276
121	145	279	334	205	144	274
121	145	285	339	205	147	280
122	145	279	337	205	144	274
122	145	285	339	205	147	276
123	145	285	337	203	147	274
123	145	285	363	225	147	276
124	145	279	341	203	144	274
124	158	279	361	231	144	274
125	145	279	342	203	144	274
125	145	285	345	203	147	274
126	154	285	338	203	147	276
126	164	285	352	203	147	280
127	145	279	352	203	144	274
127	164	285	359	205	147	276
128	145	285	338	205	147	278
128	154	293	343	209	156	278
129	145	279	337	203	144	274
129	145	279	339	205	144	280
130	145	279	344	203	144	276
130	152	285	354	203	147	278
131	145	282	342	203	144	274
131	145	285	342	205	147	280
132	160	285	355	205	147	274
132	160	285	363	205	147	276
133	160	285	339	205	147	276
133	160	285	352	205	147	280
134	145	285	352	203	147	276
134	160	285	354	205	150	278
135	145	285	337	203	147	274
135	158	285	347	203	147	282
136	152	285	354	203	147	276
136	166	285	354	205	147	280
137	145	285	333	203	147	276
137	162	285	346	205	147	280
138	145	285	352	203	147	274
138	152	293	352	203	156	278
139	145	285	337	203	144	272
139	154	285	340	219	147	282
140	145	279	339	205	144	276
140	152	285	359	205	147	286
141	166	279	339	203	144	276
141	166	285	363	203	147	278
142	145	279	342	205	144	278
142	152	285	357	205	147	280
143	143	285	337	203	147	274
143	162	285	361	211	147	274
144	145	279	339	203	144	274
144	168	285	357	205	147	286
145	164	279	341	203	144	276
145	170	285	354	203	147	278
146	145	285	337	203	147	278
146	152	285	354	205	156	282
147	143	282	337	203	144	274
147	164	285	354	205	147	274
148	164	279	337	219	144	278
148	168	285	355	219	147	280
149	143	285	348	193	147	274
149	145	285	359	203	147	276
150	170	285	339	203	147	278
150	170	285	347	205	147	278
151	147	285	337	203	147	272
151	147	293	339	205	156	276
152	145	279	359	203	144	276
152	170	285	365	217	147	278
153	145	279	355	203	144	276
153	147	285	355	205	147	282
154	160	285	363	199	147	276
154	168	285	365	205	147	280
155	145	285	341	205	147	274
155	172	285	354	215	147	276
156	152	279	339	203	144	276
156	172	285	340	203	147	278
157	152	285	344	205	147	274
157	152	285	348	205	147	278
158	143	279	359	205	144	278
158	168	285	365	237	147	280
159	145	279	341	203	144	276
159	162	285	352	203	147	278
160	145	279	341	203	144	278
160	170	285	347	205	147	278
163	143	279	339	215	144	276
163	172	285	344	217	147	276
164	158	285	0	0	147	0
164	158	285	0	0	147	0
165	145	279	344	205	144	276
165	154	285	349	237	147	276
166	143	279	339	205	144	278
166	154	285	349	217	147	280
167	0	282	0	0	147	0
167	0	285	0	0	147	0
168	150	279	337	203	147	278
168	162	285	352	203	150	280
169	145	279	348	205	147	276
169	145	285	355	223	150	278
170	143	285	339	203	147	274
170	154	285	349	239	147	274
171	160	285	341	203	147	272
171	168	285	344	205	147	278
172	152	285	345	217	147	274
172	170	285	361	219	147	282
173	145	279	347	203	144	276
173	145	285	355	203	147	276
174	145	285	339	203	147	278
174	156	285	357	229	147	280
175	145	285	345	203	147	276
175	162	285	349	203	147	276
176	145	285	335	205	147	276
176	170	285	347	205	147	280
177	147	279	337	203	144	278
177	152	285	337	205	147	282
178	145	293	339	205	156	274
178	160	293	339	239	156	276
179	147	279	337	203	144	274
179	162	285	337	205	147	274
180	145	285	337	203	147	274
180	164	293	354	203	156	278
182	145	279	341	203	144	274
182	147	293	354	229	156	278
184	145	279	337	205	144	276
184	145	285	341	205	147	278
185	145	279	339	203	144	272
185	145	293	339	205	156	274
186	145	285	337	229	144	276
186	147	285	347	231	147	280
188	145	279	337	203	144	276
188	145	285	337	203	147	276
190	145	279	339	203	144	274
190	147	285	356	203	147	280
192	145	285	337	203	147	274
192	147	293	343	205	156	278
194	145	285	350	203	144	276
194	158	285	341	205	147	280
196	145	279	345	203	144	280
196	158	285	347	203	147	280
198	145	279	337	225	144	278
198	145	279	339	229	147	280
200	145	279	337	205	144	276
200	145	285	339	221	147	280
214	145	279	337	203	144	274
214	145	285	347	225	147	280
216	150	279	341	205	144	276
216	162	285	342	205	147	278
217	147	279	350	205	144	276
217	164	282	354	205	147	276
218	145	279	355	205	144	274
218	145	282	361	209	147	276
219	164	285	357	203	147	274
219	164	285	357	205	147	286
220	164	279	341	203	144	276
220	170	279	363	203	144	282
221	145	279	334	203	144	272
221	154	279	361	203	144	282
222	143	279	341	205	144	274
222	145	285	357	205	147	276
223	152	279	338	203	144	274
223	156	279	354	205	144	278
224	145	285	339	203	147	274
224	164	285	346	203	147	280
225	145	285	339	203	147	272
225	145	285	339	205	147	278
226	145	279	348	205	144	276
226	147	279	357	205	144	280
227	145	279	339	201	144	276
227	145	285	355	205	147	276
228	145	285	339	203	147	274
228	145	285	357	203	147	276
229	145	285	352	203	147	276
229	160	285	354	203	147	278
230	145	285	352	205	147	272
230	168	293	359	205	156	280
231	164	279	339	203	144	276
231	164	285	342	221	147	276
232	145	279	339	203	144	276
232	147	285	354	205	147	276
233	145	279	339	205	144	276
233	147	285	354	205	147	276
234	145	279	355	203	144	276
234	145	285	363	203	147	284
235	145	285	343	203	147	272
235	156	285	355	205	147	276
236	145	285	342	205	147	276
236	145	285	352	221	147	278
237	145	279	334	205	144	274
237	145	285	339	205	147	280
238	145	279	339	203	144	272
238	150	279	355	203	144	278
239	154	285	341	203	147	274
239	156	285	361	205	147	282
240	150	285	335	203	147	274
240	156	285	337	205	147	278
241	166	285	333	203	147	272
241	166	285	359	205	147	280
242	145	279	341	203	144	276
242	168	285	352	225	147	278
243	145	279	361	203	144	274
243	147	285	361	205	147	276
244	145	285	346	205	147	272
244	145	285	354	221	147	274
245	143	279	334	205	144	274
245	145	285	339	221	147	278
246	145	285	344	203	147	278
246	145	285	355	205	147	278
248	145	285	339	203	147	274
248	152	285	343	205	147	278
249	145	285	337	203	147	278
249	147	285	345	203	147	278
250	145	285	338	203	147	278
250	158	285	345	205	147	278
251	147	285	345	203	147	272
251	168	285	350	205	147	274
252	145	285	337	203	147	274
252	145	285	339	205	147	280
253	145	279	339	225	144	276
253	145	285	339	225	147	278
254	145	279	339	203	144	276
254	145	285	339	203	147	276
49A	145	279	341	205	144	272
49A	164	285	343	205	147	278
KBL81	162	279	346	203	144	280
KBL81	168	285	352	203	147	282
KLB100	145	279	341	205	144	272
KLB100	145	279	355	205	144	278
KLB101	145	279	339	225	144	274
KLB101	156	285	357	231	147	278
KLB102	145	279	335	205	144	274
KLB102	145	285	341	225	147	282
KLB103	145	279	337	203	144	0
KLB103	145	279	337	203	144	0
KLB104	145	279	339	203	144	274
KLB104	145	285	341	203	147	282
KLB105	164	279	341	203	144	280
KLB105	168	285	343	205	147	280
KLB107	145	279	339	203	144	272
KLB107	145	285	350	225	147	272
KLB108	0	285	0	205	147	0
KLB108	0	285	0	211	147	0
KLB109	145	279	334	203	144	272
KLB109	168	285	339	203	147	276
KLB110	145	279	338	205	144	276
KLB110	145	285	338	205	147	278
KLB111	145	279	339	203	144	272
KLB111	147	285	343	225	147	276
KLB112	138	279	334	205	144	280
KLB112	147	279	337	225	144	280
KLB113	145	285	344	205	147	274
KLB113	147	285	357	225	147	274
KLB114	145	279	336	205	144	276
KLB114	147	285	341	221	147	278
KLB115	145	279	335	203	144	278
KLB115	147	279	345	203	144	278
KLB116	145	279	343	203	144	276
KLB116	164	285	345	203	147	284
KLB117	145	279	343	203	144	0
KLB117	145	285	343	203	147	0
KLB118	145	279	335	203	144	276
KLB118	145	279	339	211	144	276
KLB119	145	279	337	205	144	276
KLB119	145	285	344	211	147	276
KLB120	145	279	337	203	144	272
KLB120	145	285	341	205	147	278
KLB121	145	279	339	203	144	276
KLB121	145	279	343	205	144	278
KLB122	147	279	335	203	144	274
KLB122	147	285	354	205	147	274
KLB123	147	279	335	203	144	274
KLB123	147	285	343	203	147	276
KLB124	145	279	337	203	144	274
KLB124	150	285	339	211	147	278
KLB125	145	279	339	203	144	274
KLB125	145	285	343	203	147	278
KLB126	145	285	339	203	147	276
KLB126	150	285	355	203	147	276
KLB127	145	279	339	203	144	276
KLB127	147	285	339	203	147	276
KLB23	145	279	334	205	0	0
KLB23	164	285	361	225	0	0
KLB24	145	279	335	203	144	274
KLB24	164	285	361	203	147	278
KLB34	145	279	339	203	144	272
KLB34	145	285	341	225	147	276
KLB39	154	285	341	203	147	276
KLB39	170	285	343	205	147	280
KLB82	143	285	337	203	147	276
KLB82	145	285	355	203	147	278

## Sheet: Sheet3
	AD06	AD08	AD13	AD14	AD15	AD18
JP100	145/150	279/285	354/357	203/203	144/147	276/286
JP101	145/145	279/285	348/361	203/209	144/147	274/276
JP102	145/147	279/285	340/344	205/205	144/147	274/276
JP104	145/145	285/285	346/348	203/205	147/147	274/276
JP105	147/147	279/285	350/352	203/205	144/147	274/276
JP107	145/162	285/285	352/352	205/211	147/147	272/278
JP108	147/162	279/279	350/354	205/227	144/144	276/276
JP109	147/162	279/279	348/350	203/205	144/144	272/272
JP110	145/145	285/285	331/352	203/203	147/147	274/276
JP111	145/147	285/285	339/355	205/205	147/147	272/278
JP112	147/147	279/285	337/343	205/229	144/147	274/276
JP113	145/160	279/279	337/337	203/203	144/144	278/280
JP114	145/156	279/285	334/354	203/205	144/147	274/274
JP115	145/150	279/279	337/337	203/205	144/144	276/276
JP116	145/145	279/279	337/356	203/205	144/144	274/276
JP117	145/152	285/285	337/350	205/225	147/147	272/272
JP118	147/164	285/285	341/343	203/205	147/147	274/278
JP120	145/145	279/279	337/339	195/203	144/144	274/276
JP121	145/145	279/285	334/339	205/205	144/147	274/280
JP122	145/145	279/285	337/339	205/205	144/147	274/276
JP123	145/145	285/285	337/363	203/225	147/147	274/276
JP124	145/158	279/279	341/361	203/231	144/144	274/274
JP125	145/145	279/285	342/345	203/203	144/147	274/274
JP126	154/164	285/285	338/352	203/203	147/147	276/280
JP127	145/164	279/285	352/359	203/205	144/147	274/276
JP128	145/154	285/293	338/343	205/209	147/156	278/278
JP129	145/145	279/279	337/339	203/205	144/144	274/280
JP130	145/152	279/285	344/354	203/203	144/147	276/278
JP131	145/145	282/285	342/342	203/205	144/147	274/280
JP132	160/160	285/285	355/363	205/205	147/147	274/276
JP133	160/160	285/285	339/352	205/205	147/147	276/280
JP134	145/160	285/285	352/354	203/205	147/150	276/278
JP135	145/158	285/285	337/347	203/203	147/147	274/282
JP136	152/166	285/285	354/354	203/205	147/147	276/280
JP137	145/162	285/285	333/346	203/205	147/147	276/280
JP138	145/152	285/293	352/352	203/203	147/156	274/278
JP139	145/154	285/285	337/340	203/219	144/147	272/282
JP140	145/152	279/285	339/359	205/205	144/147	276/286
JP141	166/166	279/285	339/363	203/203	144/147	276/278
JP142	145/152	279/285	342/357	205/205	144/147	278/280
JP143	143/162	285/285	337/361	203/211	147/147	274/274
JP144	145/168	279/285	339/357	203/205	144/147	274/286
JP145	164/170	279/285	341/354	203/203	144/147	276/278
JP146	145/152	285/285	337/354	203/205	147/156	278/282
JP147	143/164	282/285	337/354	203/205	144/147	274/274
JP148	164/168	279/285	337/355	219/219	144/147	278/280
JP149	143/145	285/285	348/359	193/203	147/147	274/276
JP150	170/170	285/285	339/347	203/205	147/147	278/278
JP151	147/147	285/293	337/339	203/205	147/156	272/276
JP152	145/170	279/285	359/365	203/217	144/147	276/278
JP153	145/147	279/285	355/355	203/205	144/147	276/282
JP154	160/168	285/285	363/365	199/205	147/147	276/280
JP155	145/172	285/285	341/354	205/215	147/147	274/276
JP156	152/172	279/285	339/340	203/203	144/147	276/278
JP157	152/152	285/285	344/348	205/205	147/147	274/278
JP158	143/168	279/285	359/365	205/237	144/147	278/280
JP159	145/162	279/285	341/352	203/203	144/147	276/278
JP160	145/170	279/285	341/347	203/205	144/147	278/278
JP163	143/172	279/285	339/344	215/217	144/147	276/276
JP164	158/158	285/285	0/0	0/0	147/147	0/0
JP165	145/154	279/285	344/349	205/237	144/147	276/276
JP166	143/154	279/285	339/349	205/217	144/147	278/280
JP167	0/0	282/285	0/0	0/0	147/147	0/0
JP168	150/162	279/285	337/352	203/203	147/150	278/280
JP169	145/145	279/285	348/355	205/223	147/150	276/278
JP170	143/154	285/285	339/349	203/239	147/147	274/274
JP171	160/168	285/285	341/344	203/205	147/147	272/278
JP172	152/170	285/285	345/361	217/219	147/147	274/282
JP173	145/145	279/285	347/355	203/203	144/147	276/276
JP174	145/156	285/285	339/357	203/229	147/147	278/280
JP175	145/162	285/285	345/349	203/203	147/147	276/276
JP176	145/170	285/285	335/347	205/205	147/147	276/280
JP177	147/152	279/285	337/337	203/205	144/147	278/282
JP178	145/160	293/293	339/339	205/239	156/156	274/276
JP179	147/162	279/285	337/337	203/205	144/147	274/274
JP180	145/164	285/293	337/354	203/203	147/156	274/278
JP182	145/147	279/293	341/354	203/229	144/156	274/278
JP184	145/145	279/285	337/341	205/205	144/147	276/278
JP185	145/145	279/293	339/339	203/205	144/156	272/274
JP186	145/147	285/285	337/347	229/231	144/147	276/280
JP188	145/145	279/285	337/337	203/203	144/147	276/276
JP190	145/147	279/285	339/356	203/203	144/147	274/280
JP192	145/147	285/293	337/343	203/205	147/156	274/278
JP194	145/158	285/285	350/341	203/205	144/147	276/280
JP196	145/158	279/285	345/347	203/203	144/147	280/280
JP198	145/145	279/279	337/339	225/229	144/147	278/280
JP200	145/145	279/285	337/339	205/221	144/147	276/280
JP214	145/145	279/285	337/347	203/225	144/147	274/280
JP216	150/162	279/285	341/342	205/205	144/147	276/278
JP217	147/164	279/282	350/354	205/205	144/147	276/276
JP218	145/145	279/282	355/361	205/209	144/147	274/276
JP219	164/164	285/285	357/357	203/205	147/147	274/286
JP220	164/170	279/279	341/363	203/203	144/144	276/282
JP221	145/154	279/279	334/361	203/203	144/144	272/282
JP222	143/145	279/285	341/357	205/205	144/147	274/276
JP223	152/156	279/279	338/354	203/205	144/144	274/278
JP224	145/164	285/285	339/346	203/203	147/147	274/280
JP225	145/145	285/285	339/339	203/205	147/147	272/278
JP226	145/147	279/279	348/357	205/205	144/144	276/280
JP227	145/145	279/285	339/355	201/205	144/147	276/276
JP228	145/145	285/285	339/357	203/203	147/147	274/276
JP229	145/160	285/285	352/354	203/203	147/147	276/278
JP230	145/168	285/293	352/359	205/205	147/156	272/280
JP231	164/164	279/285	339/342	203/221	144/147	276/276
JP232	145/147	279/285	339/354	203/205	144/147	276/276
JP233	145/147	279/285	339/354	205/205	144/147	276/276
JP234	145/145	279/285	355/363	203/203	144/147	276/284
JP235	145/156	285/285	343/355	203/205	147/147	272/276
JP236	145/145	285/285	342/352	205/221	147/147	276/278
JP237	145/145	279/285	334/339	205/205	144/147	274/280
JP238	145/150	279/279	339/355	203/203	144/144	272/278
JP239	154/156	285/285	341/361	203/205	147/147	274/282
JP240	150/156	285/285	335/337	203/205	147/147	274/278
JP241	166/166	285/285	333/359	203/205	147/147	272/280
JP242	145/168	279/285	341/352	203/225	144/147	276/278
JP243	145/147	279/285	361/361	203/205	144/147	274/276
JP244	145/145	285/285	346/354	205/221	147/147	272/274
JP245	143/145	279/285	334/339	205/221	144/147	274/278
JP246	145/145	285/285	344/355	203/205	147/147	278/278
JP248	145/152	285/285	339/343	203/205	147/147	274/278
JP249	145/147	285/285	337/345	203/203	147/147	278/278
JP250	145/158	285/285	338/345	203/205	147/147	278/278
JP251	147/168	285/285	345/350	203/205	147/147	272/274
JP252	145/145	285/285	337/339	203/205	147/147	274/280
JP253	145/145	279/285	339/339	225/225	144/147	276/278
JP254	145/145	279/285	339/339	203/203	144/147	276/276
JP29	145/145	279/285	337/339	203/203	144/147	272/280
JP30	145/145	279/285	343/343	205/221	144/147	276/276
JP31	145/145	279/285	336/343	203/205	144/147	276/278
JP32	145/145	279/285	341/361	203/203	144/147	272/274
JP34	145/158	285/285	334/350	203/205	147/147	276/280
JP35	145/170	279/285	337/339	203/233	144/147	276/276
JP37	147/158	285/285	339/347	203/203	147/147	276/276
JP38	147/147	285/285	337/337	205/225	147/147	276/280
JP39	145/145	285/285	341/355	205/205	147/147	272/280
JP40	145/145	279/285	337/343	203/225	144/147	282/282
JP41	145/145	279/279	339/343	203/231	144/144	274/276
JP42	145/170	279/285	339/342	203/203	144/147	280/280
JP43	145/166	285/285	336/337	205/205	147/147	276/278
JP44	145/158	279/285	343/355	203/203	144/147	272/278
JP45	158/158	279/279	334/355	203/231	144/144	276/280
JP46	145/147	279/285	337/343	203/205	144/147	276/276
JP48	145/145	285/285	339/341	203/219	147/147	276/276
JP49	145/164	279/285	341/343	205/205	147/150	272/278
JP49A	145/164	279/285	341/343	205/205	144/147	272/278
JP50	166/170	279/279	341/343	203/205	144/144	274/276
JP51	145/166	279/285	339/339	205/219	144/147	274/276
JP52	147/168	279/285	337/343	203/205	144/147	276/276
JP53	145/168	279/285	335/337	203/203	144/147	276/276
JP54	147/147	279/285	337/337	203/205	144/147	274/278
JP55	145/164	279/285	341/341	225/231	144/147	276/278
JP56	145/166	285/285	337/341	203/225	147/147	274/276
JP57	158/158	285/285	337/337	203/225	147/147	274/276
JP58	145/145	279/285	337/343	203/203	144/147	276/278
JP59	145/147	285/285	336/343	203/205	147/147	274/280
JP60	138/138	285/285	335/348	205/225	147/147	276/278
JP62	145/160	279/285	343/354	203/205	144/147	274/274
JP63	145/145	279/279	341/343	203/203	144/144	274/274
JP64	145/145	279/279	337/337	205/227	144/144	274/278
JP66	145/145	279/285	335/337	203/205	144/147	272/276
JP67	145/145	279/279	339/339	205/219	144/144	274/274
JP69	145/147	285/285	337/341	203/219	147/147	274/278
JP70	138/145	279/285	335/348	203/205	144/147	276/278
JP71	145/145	279/285	335/352	205/205	144/147	276/276
JP72	138/145	279/285	348/355	205/205	144/147	274/276
JP73	145/166	279/285	348/352	203/205	144/147	272/280
JP75	145/164	285/285	339/348	205/205	147/147	278/284
JP76	145/145	285/285	341/352	203/205	147/147	276/276
JP77	145/145	279/285	331/348	205/205	144/147	274/276
JP78	145/166	279/285	343/348	205/217	144/147	274/274
JP79	145/164	279/285	343/343	203/219	144/147	276/278
JP80	138/164	279/285	331/348	205/211	144/147	276/284
JP81	145/164	285/285	343/343	205/219	147/147	274/276
JP82	138/145	279/285	337/341	203/205	144/147	274/278
JP84	145/178	279/285	348/355	203/205	144/147	274/278
JP85	168/178	279/285	341/355	203/203	144/147	276/278
JP90	147/164	279/279	337/341	205/205	144/144	276/278
JP91	145/164	279/285	331/339	203/203	144/147	276/276
JP92	145/145	279/279	342/357	205/205	144/144	274/278
JP93	138/138	285/285	342/350	205/205	147/147	274/278
JP94	138/145	285/285	331/357	205/211	147/147	274/274
JP95	145/145	279/285	331/348	205/211	144/147	274/276
JP96	145/145	285/285	340/357	203/209	147/147	272/278
JP97	145/166	285/285	337/348	205/205	147/147	276/284
JP98	145/145	279/279	331/348	203/205	144/144	274/278
JP99	154/170	279/285	0/0	203/205	144/147	278/280
KLB100	145/145	279/279	341/355	205/205	144/144	272/278
KLB101	145/156	279/285	339/357	225/231	144/147	274/278
KLB102	145/145	279/285	335/341	205/225	144/147	274/282
KLB103	145/145	279/279	337/337	203/203	144/144	0/0
KLB104	145/145	279/285	339/341	203/203	144/147	274/282
KLB105	164/168	279/285	341/343	203/205	144/147	280/280
KLB107	145/145	279/285	339/350	203/225	144/147	272/272
KLB108	0/0	285/285	0/0	205/211	147/147	0/0
KLB109	145/168	279/285	334/339	203/203	144/147	272/276
KLB110	145/145	279/285	338/338	205/205	144/147	276/278
KLB111	145/147	279/285	339/343	203/225	144/147	272/276
KLB112	138/147	279/279	334/337	205/225	144/144	280/280
KLB113	145/147	285/285	344/357	205/225	147/147	274/274
KLB114	145/147	279/285	336/341	205/221	144/147	276/278
KLB115	145/147	279/279	335/345	203/203	144/144	278/278
KLB116	145/164	279/285	343/345	203/203	144/147	276/284
KLB117	145/145	279/285	343/343	203/203	144/147	0/0
KLB118	145/145	279/279	335/339	203/211	144/144	276/276
KLB119	145/145	279/285	337/344	205/211	144/147	276/276
KLB120	145/145	279/285	337/341	203/205	144/147	272/278
KLB121	145/145	279/279	339/343	203/205	144/144	276/278
KLB122	147/147	279/285	335/354	203/205	144/147	274/274
KLB123	147/147	279/285	335/343	203/203	144/147	274/276
KLB124	145/150	279/285	337/339	203/211	144/147	274/278
KLB125	145/145	279/285	339/343	203/203	144/147	274/278
KLB126	145/150	285/285	339/355	203/203	147/147	276/276
KLB127	145/147	279/285	339/339	203/203	144/147	276/276
KLB23	145/164	279/285	334/361	205/225	0/0	0/0
KLB24	145/164	279/285	335/361	203/203	144/147	274/278
KLB34	145/145	279/285	339/341	203/225	144/147	272/276
KLB39	154/170	285/285	341/343	203/205	147/147	276/280
KLB81	162/168	279/285	346/352	203/203	144/147	280/282
KLB82	143/145	285/285	337/355	203/203	147/147	276/278
