# Supplementary material for: New Genetic and Linguistic Analyses Show Ancient Human Influence on Baobab Evolution and Distribution in Australia
Source: PLoS One. 2015 Apr 1;10(4):e0119758. doi: 10.1371/journal.pone.0119758 (PMC4382155; doi:10.1371/journal.pone.0119758)
Supplement: S2 Dataset — (XLS) [file pone.0119758.s002.xls]

## Sheet: Boab entries_Supplementary_mate
Language	Classification		Terms						References
									First entries are our interpretations of the word in a standard orthography. Items in square brackets are as in the original.
			boab tree	boab tree	boab tree	boab fruit	boab pith
Gajirrabeng	PNy - Jarrakan		kertewun			kertewun			Kofod, Frances et al. Gajirrabeng 8 Gaj Dict_edOct2, courtesy Mirima Woolab-gerring.
Kija	PNy - Jarrakan		jumulu-ny	jarukuny		larrkartim	jang-nge		McConvell, Patrick, Kija fieldnotes (n.d.)
Miriwoong	PNy - Jarrakan		kertewun [gad.awun]			kertewun [gad.awun]			Kofod, Frances, Miriwoong.xls, MS1896, AIATSIS-ASEDA
Karajarri	PNy - Marrngu		larrkarti						Burgman, Albert, Karajarri - English Dictionary, South Hedland: Wangka Maya (2005)
Nyangumarta	PNy - Marrngu		larrkarti						http://www.wangkamaya.org.au/pilbara-languages/nyangumarta-dictionary
Bilinarra	PNy - Ngumpin		jamulang						Meakins, Felicity. 2009. First Bilinara Dictionary. Katherine: Diwurru-wurru Jaru.
Jaru	PNy - Ngumpin		jamarlu	larrkarti		larrkarti			Kimberley Language Resource Centre, Jaru dictionary, Draft edition Unpublished (June 1992)
Jaminjung	nPNy - West Mindi		kuruwuny			jangi	jangi		Schultze-Berndt, Eva, 2003, Jaminjung/Ngaliwurru English Draft Dictionary ; Jones,J.M. et al.2011.Jaminjung, Ngaliwurru and Nungali Plants and Animals
Ngarinyman	nPNy - West Mirndi		jamulang			jangi	jangi		Widitjburru B. et al., 2009.Ngarinman plants and animals. NT Parks and Wildlife and Diwurruwurru Aboriginal Corporation
Nungali	nPNy-West Mindi		muruwun [mooroowoon]						Schultze-Berndt, Eva, 2003, Jaminjung/Ngaliwurru English Draft Dictionary
Walmajarri	PNy - Ngumpin		larrkarti			larrkarti			Hudson, Joyce, 1978. The core of Walmatjari grammar, Canberra: Australian Institute of Aboriginal Studies
Gurindji	PNy - Ngumpin		jimulung						Meakins F, P McConvell, E Charola, N McNair, H McNair, L Campbell & Gurindji consultants and contributors, 2013. Gurindji to English Dictionary, Batchelor: Batchelor Press.
Bunuba	nPNy - Bunuban		larrkari			wajarr			Rumsey, Alan, 2000. Bunuba, In: Dixon, R. M. W. and B. J. Blake, The Handbook of Australian Languages, volume 5, Oxford etc.: Oxford University Press, pp. 35-152.																KLRC, Thangani Bunuba:Bunuba Stories. KLRC:Halls Creek (1998)
Gooniyandi	nPNy - Bunuban		larrkarti						McGregor, William B.1990, A functional grammar of Gooniyandi, Amsterdam/Philadelphia: John Benjamins
Wardaman	nPNy - isolate		muruwun						Merlan, Francesca, A Grammar of Wardaman: A Language of the Northern Territory of Australia, Berlin: Walter de Gruyter
Bardi	nPNy - Nyulnyulan		larrkiti						Aklif, Gedda, 1999. Ardiyooloon Bardi ngaanka: One Arm Point Bardi dictionary, KLRC: Halls Creek (1999)
Nyikina	nPNy - Nyulnyulan		larrkati						Stokes, Bronwyn, 1982. A description of the Nyigina language of the Kimberley region of Western Australia, Unpublished PhD thesis, The Australian National University.
Yawuru	nPNy - Nyulnyulan		larrkati						Hosokawa K. Yawuru wordlist, AIATSIS Library, Canberra (n.d.)
Nyul-nyul	nPNy - Nyulnyulan		larrkirt						McGregor, William.2012. The Nyulnyul language of Dampier Land, Western Australia. Canberra: Pacific Linguisticis.
Kwini	nPNy - Worrorran		jungulan	jumulu					McGregor, William. 1992. Handbook of Kimberley Languages.Volume 2: Word Lists. Draft ms.
Ngarinyin	nPNy - Worrorran		junguri	jungulan	larrkarri	yukun	irrke		Coate, H. and A.P. Capell,1974. Ngarinjin-English dictionary, Sydney: Oceanic Linguistics; Saunders, Thomas, 2012.Ngarinyin fieldnotes (2012)
Unggumi	nPNy - Worrorran					lakeri			McGregor, William, Unggumi fieldnotes (1980s?)
Worrorra	nPNy - Worrorran		jungurim			yu:ku			Clendon, Mark, 2000. Provisional Worrorra dictionary, Halls Creek: KLRC.
Wunambal	nPNy - Worrorran		junguri	potkurri [bodgurri]	wajarr				Capell, Arthur, 1940-41.Notes on the Wunambal language Oceania 11-3, pp 295-308; Crawford, I. M.1982. Traditional Aboriginal plant resources in the Kalumburu area, Perth: Western Australian Museum.
Wurla	nPNy - Worrorran		wajarr						Rumsey, Alan. English-Wurla wordbook. Manuscipt and computer file (1990)						file (1990)
